# Supplementary material for: Survival Outcomes and Predictive Factors for Female Urethral Cancer: Long-term Experience with Korean Patients
Source: PubMed Central journal article supplement — J Korean Med Sci. 2015 Jul 15;30(8):1143–9. doi: 10.3346/jkms.2015.30.8.1143 (PMC4520946; doi:10.3346/jkms.2015.30.8.1143), 2015-07-15
Supplement: jkms-30-1143-s001.pdf [file jkms-30-1143-s001.pdf]

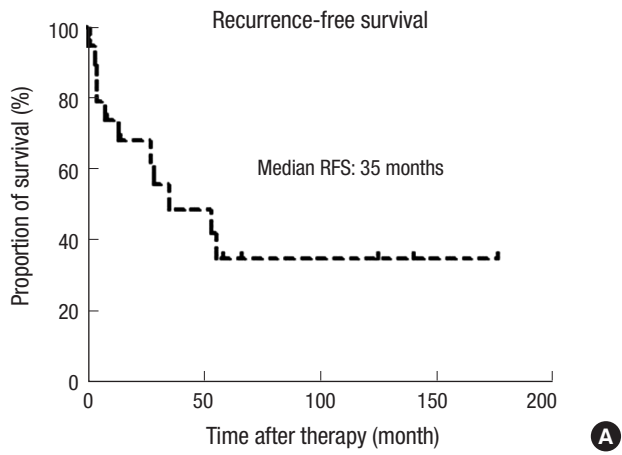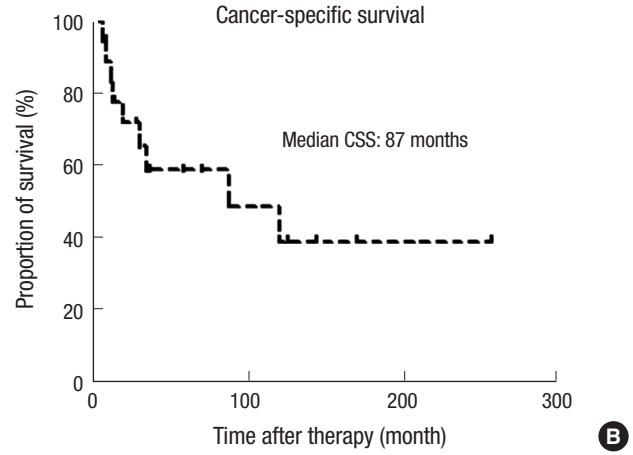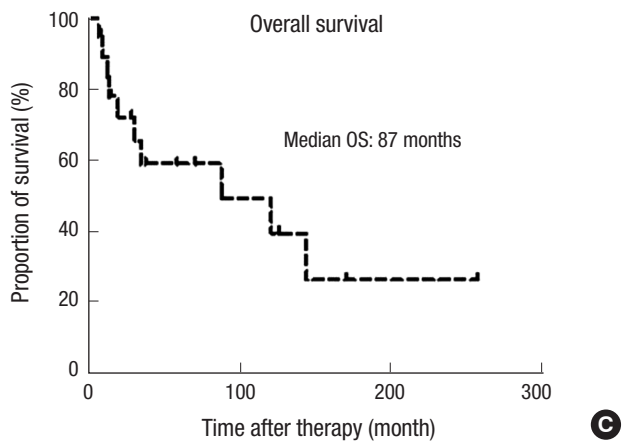

**Fig. S1.** Kaplan-Meier analysis of survival outcomes. (A) Recurrence-free survival, (B) cancer-specific survival, and (C) overall survival of female urethral cancer patients.
