# Supplementary material for: Survival Outcomes and Predictive Factors for Female Urethral Cancer: Long-term Experience with Korean Patients
Source: PubMed Central journal article supplement — J Korean Med Sci. 2015 Jul 15;30(8):1143–9. doi: 10.3346/jkms.2015.30.8.1143 (PMC4520946; doi:10.3346/jkms.2015.30.8.1143), 2015-07-15
Supplement: jkms-30-1143-s002.pdf [file jkms-30-1143-s002.pdf]

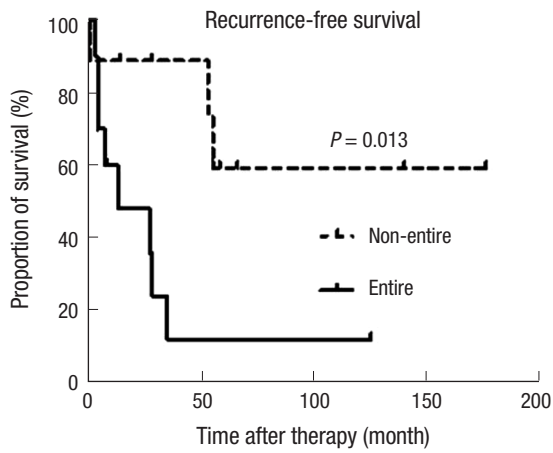

**A**

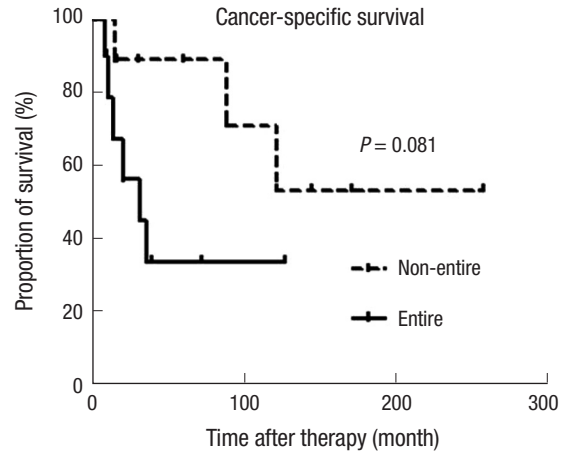

**B**

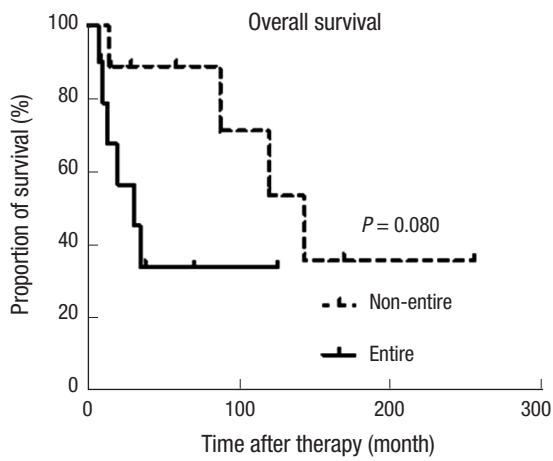

**C**

**Fig. S2.** Comparison of survival outcomes. **(A)** Recurrence-free survival, **(B)** cancer-specific survival, and **(C)** overall survival of female urethral cancer patients according to tumor location analyzed by the Kaplan-Meier method and log-rank tests.
